# Supplementary material for: The AEMET-&lt;i&gt;γ&lt;/i&gt;SREPS over the Antarctic Peninsula and the impact of kilometric-resolution EPS on logistic activities on the continent
Source: Copernicus journal article supplement (doi:10.5194/asr-17-209-2020), 2020-10-08
Supplement: Supplementary file 1 [file asr-17-209-2020-supplement.zip]

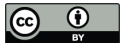

## *Supplement of*

# **The AEMET- $\gamma$ SREPS over the Antarctic Peninsula and the impact of kilometric-resolution EPS on logistic activities on the continent**

**Sergi Gonzalez et al.**

*Correspondence to:* Alfons Callado (acalladop@aemet.es) and Sergi Gonzalez (sgonzalezh@aemet.es)

- asr-17-209-2020-supplement-title-page.pdf
- crps\_CCtot\_IFSENS\_gSREPS.png
- crps\_Pmsl\_IFSENS\_gSREPS.png
- crps\_Q2m\_IFSENS\_gSREPS.png
- rank\_histogram\_CCtot\_IFSENS\_gSREPS\_FacetBy\_mname\_leadtime\_36.png
- rank\_histogram\_Pmsl\_IFSENS\_gSREPS\_FacetBy\_mname\_leadtime\_36.png
- rank\_histogram\_Q2m\_IFSENS\_gSREPS\_FacetBy\_mname\_leadtime\_36.png
- spread\_skill\_CCtot\_IFSENS\_gSREPS.png
- spread\_skill\_Pmsl\_IFSENS\_gSREPS.png
- spread\_skill\_Q2m\_IFSENS\_gSREPS.png

The copyright of individual parts of the supplement might differ from the CC BY 4.0 License.
